# Supplementary material
Source: PubMed Central journal article supplement (PMC4448203)
Supplement: ajtr0007-0640-f5.pdf [file ajtr0007-0640-f5.pdf]

## Clinical and biological relevance of neuropilin 1 and 2 in osteosarcoma

**Supplemental Table 1.** List of primers used in PCR

| Gene             |         | Oligonucleotide sequences            |
|------------------|---------|--------------------------------------|
| NRP1 full length | Forward | 5'-CTTGGTGGGATTGCTGTGGATGACATTAGT-3' |
|                  | Reverse | 3'-ATCTGGGGTAGGAGTAGTGGTAGTATCGG-5'  |
| NRP2 full length | Forward | 5'-CCCAGCTACGACATGGAGTACCAGATT-3'    |
|                  | Reverse | 3'-GCCGAAAACGTCCACTCTTAAAATTCACC-5'  |
| VEGF-A           | Forward | 5'-TGCCTTGCTGCTCTACCTCC-3'           |
|                  | Reverse | 3'-CACTGTTCGGCTCCGCCACT-5'           |
| VEGFR-1          | Forward | 5'-ATGAGCAGTGTGAGCGGCTCCC-3'         |
|                  | Reverse | 3'-CGCAGTGGTCGTCGCTTTCGAA-5'         |
| VEGFR-2          | Forward | 5'-CGTCATGGATCCAGATGAACTCCC-3'       |
|                  | Reverse | 3'-GGTTTCCCGTGCTAAGGCAGTTC-5'        |

Clinical and biological relevance of neuropilin 1 and 2 in osteosarcoma

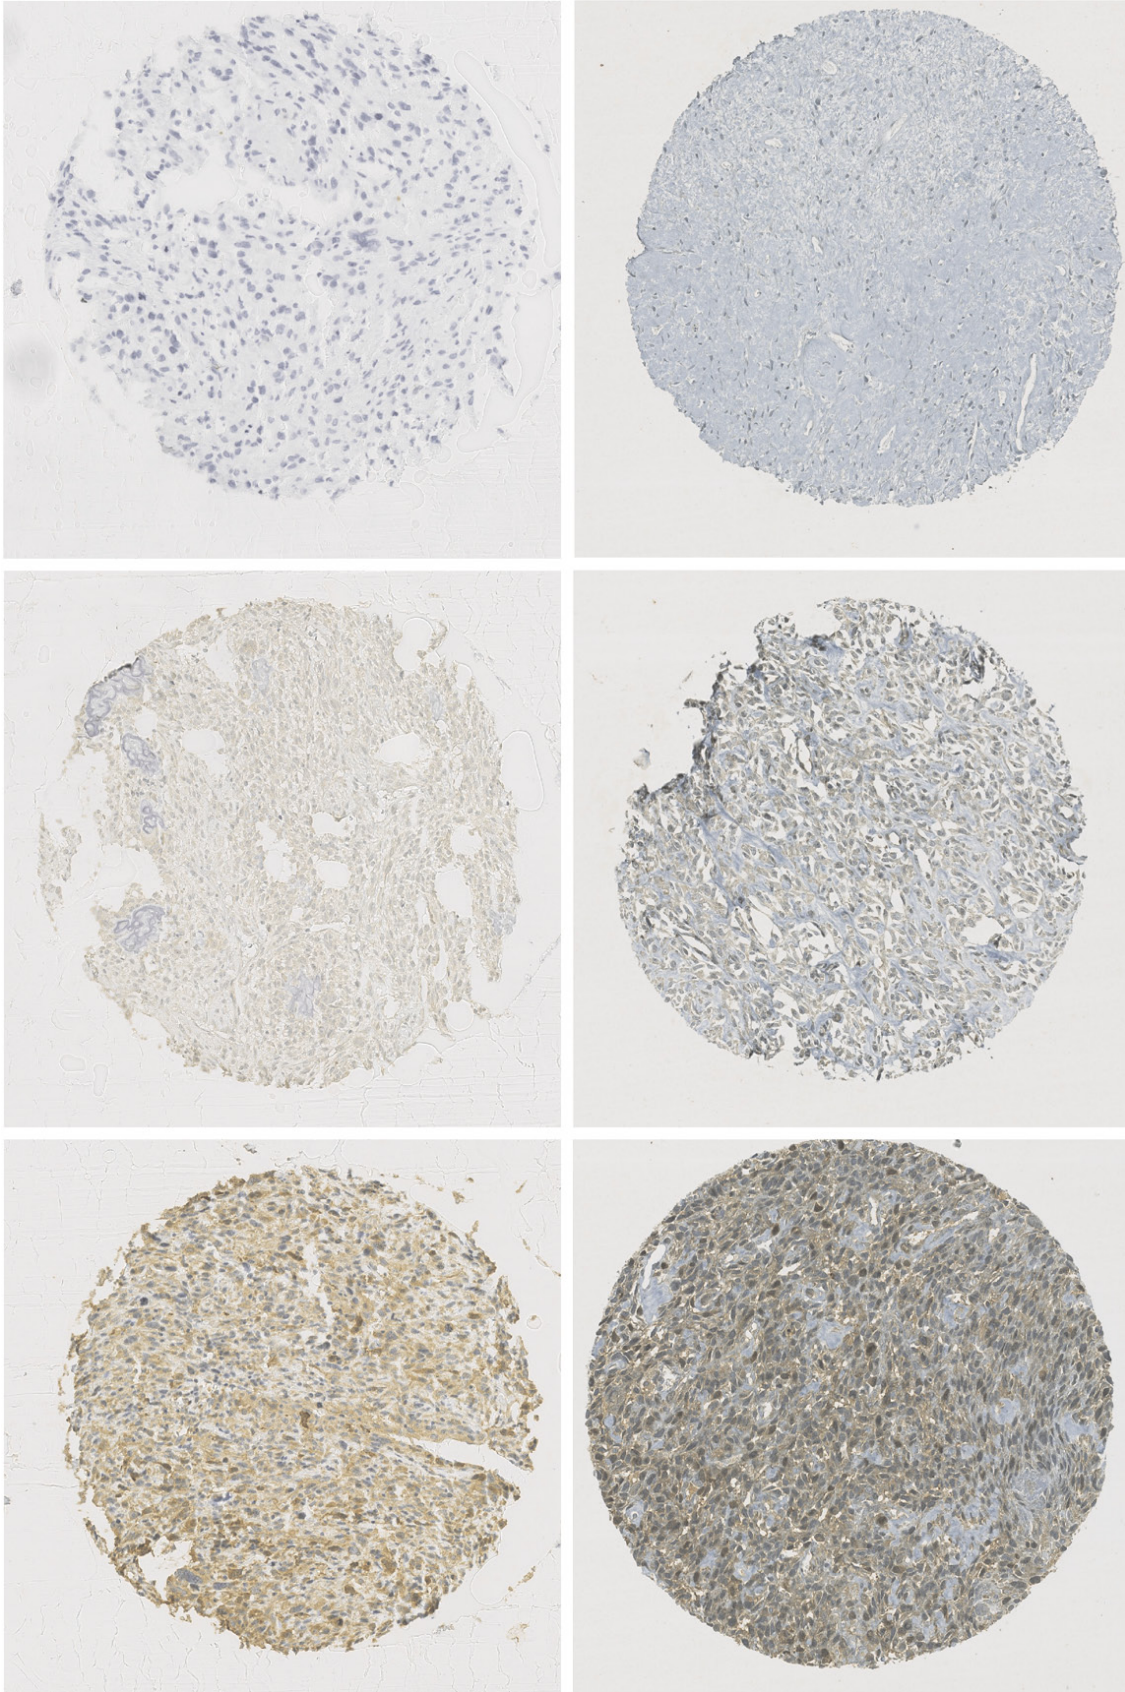

**Supplemental Figure 1.** Example cores from TMA showing weak, moderate and strong staining of NRP1 (left side) and NRP2 (right side).
